# Supplementary material
Source: ML conference proceedings conference paper supplement (https://proceedings.mlr.press/v108/lejeune20a.html)
Supplement: Supplementary file 1 [file lejeune20a-supp.pdf]

## A USEFUL LEMMAS

We introduce the additional notation of

$$\boldsymbol{\xi}_t = \sum_{s=1}^t \mathbf{e}_{\pi_s} (x_s - \mu_{\pi_s}), \quad (24)$$

$$\sigma_i^t = \sqrt{(\mathbf{V}_t^{-1})_{ii}}, \quad (25)$$

$$\mathbf{N}_t = \text{diag}(\mathbf{n}_t), \quad (26)$$

to be used in the proofs of our results. The following lemmas are proved in Section E.

**Lemma A.1.** *With probability at least  $1 - \delta$ , for any  $i \in [N]$  and  $t \geq 1$ ,*

$$|\widehat{\mu}_i^t - \mu_i| \leq \sigma_i^t \left( \frac{R}{\gamma} \sqrt{\log \left( \frac{|\mathbf{V}_t|}{\delta^2 |\mathbf{L}_\lambda|} \right)} + \|\boldsymbol{\mu}\|_{\mathbf{L}_\lambda} \right). \quad (27)$$

**Lemma A.2.** *For all  $i \in [N]$  and  $t \geq 0$ ,*

$$\sigma_i^t \leq \sqrt{\frac{(\sigma_i^0)^2}{1 + (\sigma_i^0)^2 n_i^t / \gamma}}. \quad (28)$$

**Lemma A.3.** *Let  $d_T$  be the effective dimension. Then*

$$\log \frac{|\mathbf{V}_T|}{|\mathbf{L}_\lambda|} \leq 2d_T \log \left( 1 + \frac{T}{\gamma\lambda} \right). \quad (29)$$

## B PROOF OF PROPOSITION 2.2

For Algorithm 1 to succeed, it must be that  $\widehat{\mu}_i \geq \tau$  for each  $i$  such that  $\mu_i \geq \tau + \varepsilon$  and  $\widehat{\mu}_i < \tau$  for each  $i$  such that  $\mu_i < \tau - \varepsilon$  (we can make this inequality strict or non-strict without changing probabilistic statements since  $\widehat{\boldsymbol{\mu}}$  is a continuous random variable). For a given  $i$ , this is satisfied if  $|\widehat{\mu}_i - \mu_i| \leq |\mu_i - \tau|$ . We show this for the case that  $\mu_i \geq \tau + \varepsilon$ . If  $\widehat{\mu}_i \geq \mu_i$  in this case, then the necessary condition is satisfied. If  $\widehat{\mu}_i < \mu_i$ , then

$$\mu_i - \tau = |\mu_i - \tau| \geq |\widehat{\mu}_i - \mu_i| = \mu_i - \widehat{\mu}_i \quad (30)$$

$$\implies \tau \leq \widehat{\mu}_i. \quad (31)$$

The case where  $\mu_i \leq \tau - \varepsilon$  is analogous. Thus, a sufficient condition for the success of Algorithm 1 is that  $|\widehat{\mu}_i - \mu_i| \leq |\mu_i - \tau|$  for all  $i$  such that  $|\mu_i - \tau| \geq \varepsilon$ . If we use Lemmas A.1, A.2, and A.3, we know that with probability at least  $1 - \delta$ ,

$$|\widehat{\mu}_i^t - \mu_i| \leq \sigma_i^t \left( \frac{R}{\gamma} \sqrt{\log \left( \frac{|\mathbf{V}_t|}{\delta^2 |\mathbf{L}_\lambda|} \right)} + \|\boldsymbol{\mu}\|_{\mathbf{L}_\lambda} \right) \quad (32)$$

$$\leq \sqrt{\frac{(\sigma_i^0)^2}{1 + (\sigma_i^0)^2 n_i^t / \gamma}} \left( \frac{R}{\gamma} \sqrt{2d_T \log \left( 1 + \frac{T}{\gamma\lambda} \right) - 2 \log \delta} + \|\boldsymbol{\mu}\|_{\mathbf{L}_\lambda} \right) \quad (33)$$

$$\leq \sqrt{\frac{\gamma}{n_i^t}} \left( \frac{R}{\gamma} \sqrt{2d_T \log \left( 1 + \frac{T}{\gamma\lambda} \right) - 2 \log \delta} + \|\boldsymbol{\mu}\|_{\mathbf{L}_\lambda} \right). \quad (34)$$

Thus Algorithm 1 succeeds with probability at least  $1 - \delta$  if, for all  $i$  such that  $|\mu_i - \tau| \geq \varepsilon$ ,

$$\sqrt{\frac{\gamma}{n_i^t}} \left( \frac{R}{\gamma} \sqrt{2d_T \log \left( 1 + \frac{T}{\gamma\lambda} \right) - 2 \log \delta} + \|\boldsymbol{\mu}\|_{\mathbf{L}_\lambda} \right) \leq |\mu_i - \tau|. \quad (35)$$

Because Algorithm 1 has an equal sampling allocation for each arm, for  $T = kN$  we have that  $n_i^t = k = T/N$ . Then since for each  $i$  the left-hand side of (35) is the same, we can write the complete sufficient condition as

$$\sqrt{\frac{\gamma N}{T}} \left( \frac{R}{\gamma} \sqrt{2d_T \log \left( 1 + \frac{T}{\gamma \lambda} \right) - 2 \log \delta} + \|\boldsymbol{\mu}\|_{\mathbf{L}_\lambda} \right) \leq \min \{ |\mu_i - \tau| : |\mu_i - \tau| \geq \varepsilon \}. \quad (36)$$

The smallest  $\delta$  for which this inequality holds is

$$\delta = \exp \left\{ -\frac{\gamma^2}{2R^2} \left( \sqrt{\frac{T}{\gamma \tilde{H}}} - \|\boldsymbol{\mu}\|_{\mathbf{L}_\lambda} \right)^2 + d_T \log \left( 1 + \frac{T}{\gamma \lambda} \right) \right\}, \quad (37)$$

provided  $\|\boldsymbol{\mu}\|_{\mathbf{L}_\lambda} \leq \sqrt{\frac{T}{\gamma \tilde{H}}}$ , where  $\tilde{H} \triangleq N / \min \{ |\mu_i - \tau|^2 : |\mu_i - \tau| \geq \varepsilon \}$ .

## C PROOF OF THEOREM 3.1

The proof follows the same general strategy as that of Theorem 2 of Locatelli et al. (2016).

### C.1 A Favorable Event

Let

$$\delta = \exp \left\{ -\frac{\gamma^2}{2R^2} \left( \frac{1}{3M+1} \sqrt{\frac{T}{\gamma H}} - \|\boldsymbol{\mu}\|_{\mathbf{L}_\lambda} \right)^2 + d_T \log \left( 1 + \frac{T}{\gamma \lambda} \right) \right\}, \quad (38)$$

and consider for the rest of the proof an event of probability at least  $1 - \delta$  that gives us the result of Lemma A.1. On this event then, for all  $i \in [N]$ ,

$$\begin{aligned} |\hat{\mu}_i^t - \mu_i| &\leq \sigma_i^t \left( \frac{R}{\gamma} \sqrt{\log \left( \frac{|\mathbf{V}_t|}{\delta^2 |\mathbf{L}_\lambda|} \right) + \|\boldsymbol{\mu}\|_{\mathbf{L}_\lambda}} \right) \\ &\leq \sigma_i^t \left( \frac{R}{\gamma} \sqrt{2d_T \log(1 + T/\gamma\lambda) - 2 \log \delta} + \|\boldsymbol{\mu}\|_{\mathbf{L}_\lambda} \right) \\ &\leq \frac{\sigma_i^t}{3M+1} \sqrt{\frac{T}{\gamma H}}, \end{aligned} \quad (39)$$

where the second inequality comes from Lemma A.3 and the third inequality comes from plugging in  $\delta$  using the fact that  $\|\boldsymbol{\mu}\|_{\mathbf{L}_\lambda} \leq \frac{1}{3M+1} \sqrt{\frac{T}{\gamma H}}$ .

### C.2 A Helpful Arm

At time  $T$ , there must exist an arm  $k$  such that  $n_k^T \geq \frac{T}{H\Delta_k^2}$ . If this were not true, then

$$T = \sum_{i=1}^N n_i^T < \sum_{i=1}^N \frac{T}{H\Delta_i^2} = T, \quad (40)$$

which is a contradiction. Let  $t \leq T$  be the last time this arm was pulled, and consider this time for the rest of the proof. Note that  $n_k^t = n_k^T \geq \frac{T}{H\Delta_k^2}$ .

### C.3 Bounding the Other Arms using the Helpful Arm

When  $n_i^t \geq 1$ , using Lemma A.2,

$$\begin{aligned} \sigma_i^t \sqrt{n_i^t + \alpha} &\leq \sqrt{\frac{(\sigma_i^0)^2 (n_i^t + \alpha)}{1 + (\sigma_i^0)^2 n_i^t / \gamma}} \\ &\leq \sqrt{\frac{\gamma (n_i^t + \alpha)}{n_i^t}} \\ &\leq \sqrt{\gamma(1 + \alpha)}. \end{aligned} \quad (41)$$

So, including the case of  $n_i^t = 0$ ,

$$\sigma_i^t \sqrt{n_i^t + \alpha} \leq \max \left\{ \sigma_i^0 \sqrt{\alpha}, \sqrt{\gamma(1 + \alpha)} \right\} \leq \sqrt{\gamma} M, \quad (42)$$

where the last inequality comes from the fact that  $\sigma_i^0 \leq 1/\sqrt{\lambda}$ .

We know that

$$|\widehat{\mu}_i^t - \mu_i| \geq \left| |\widehat{\mu}_i^t - \tau| - |\mu_i - \tau| \right| = |\widehat{\Delta}_i^t - \Delta_i|, \quad (43)$$

so we can find a lower bound:

$$\begin{aligned} z_k^t &= \widehat{\Delta}_k^t \sqrt{n_k^t + \alpha} \\ &\geq \left( \Delta_k - \frac{\sigma_k^t}{3M+1} \sqrt{\frac{T}{\gamma H}} \right) \sqrt{n_k^t} \\ &\geq \sqrt{\frac{T}{H}} \frac{3M}{3M+1}, \end{aligned} \quad (44)$$

where the last inequality comes from our bound on  $n_k^t$  and from (41) with  $\alpha = 0$ . For the upper bound,

$$\begin{aligned} z_i^t &= \widehat{\Delta}_i^t \sqrt{n_i^t + \alpha} \\ &\leq \left( \Delta_i + \frac{\sigma_i^t}{3M+1} \sqrt{\frac{T}{\gamma H}} \right) \sqrt{n_i^t + \alpha} \\ &\leq \Delta_i \sqrt{n_i^t + \alpha} + \frac{M}{3M+1} \sqrt{\frac{T}{H}}. \end{aligned} \quad (45)$$

Since we pulled arm  $k$  on round  $t$ ,  $z_k^t \leq z_i^t$ , so

$$\sqrt{\frac{T}{H}} \frac{3M}{3M+1} \leq \Delta_i \sqrt{n_i^t + \alpha} + \frac{M}{3M+1} \sqrt{\frac{T}{H}}, \quad (46)$$

$$\implies \frac{1}{3M+1} \sqrt{\frac{T}{H}} \leq \frac{\Delta_i \sqrt{n_i^t + \alpha}}{2M}. \quad (47)$$

### C.4 Wrapping Up

Finally, we have that

$$|\widehat{\mu}_i^T - \mu_i| \leq \frac{\sigma_i^T}{3M+1} \sqrt{\frac{T}{\gamma H}} \leq \frac{\Delta_i \sigma_i^t \sqrt{n_i^t + \alpha}}{2\sqrt{\gamma} M} \leq \frac{\Delta_i}{2}, \quad (48)$$

where the second inequality comes from the fact that  $\sigma_i^t$  is decreasing in  $t$  and from (47). Now for  $i$  such that  $\mu_i \geq \tau + \varepsilon$ , we have

$$\widehat{\mu}_i^T \geq \mu_i - \frac{\Delta_i}{2} = \mu_i - \frac{\mu_i - \tau + \varepsilon}{2} = \frac{\tau + \mu_i - \varepsilon}{2} \geq \tau. \quad (49)$$

For  $i$  such that  $\mu_i \leq \tau - \varepsilon$ , we have

$$\widehat{\mu}_i^T \leq \mu_i + \frac{\Delta_i}{2} = \mu_i + \frac{\tau - \mu_i + \varepsilon}{2} = \frac{\tau + \mu_i + \varepsilon}{2} \leq \tau. \quad (50)$$

## D PROOF OF PROPOSITION 3.6

The proof of this proposition is the same as the proof of proposition 2.2 until the choice of the sampling allocation  $n_i^t = \beta_i t$ . Continuing from (35), we must choose  $\beta$  such that, for all  $i$  such that  $|\mu_i - \tau| \geq \varepsilon$ ,

$$\sqrt{\frac{\gamma}{T}} \left( \frac{R}{\gamma} \sqrt{2d_T \log \left( 1 + \frac{T}{\gamma\lambda} \right) - 2 \log \delta + \|\boldsymbol{\mu}\|_{\mathbf{L}_\lambda}} \right) \leq \sqrt{\beta_i} |\mu_i - \tau|. \quad (51)$$

To optimize this inequality such that it holds for the smallest possible  $\delta$ , we must make the right-hand side as large as possible. That is, we must choose  $\beta$  that maximizes

$$\min_{i: |\mu_i - \tau| \geq \varepsilon} \sqrt{\beta_i} |\mu_i - \tau|. \quad (52)$$

To maximize this minimum, we must choose  $\beta$  that makes all of the terms the same. With the constraint that  $\sum_i \beta_i = 1$ , this means that we must choose

$$\beta_i = \begin{cases} (H_* |\mu_i - \tau|^2)^{-1} & \text{if } |\mu_i - \tau| \geq \varepsilon \\ 0 & \text{otherwise,} \end{cases} \quad (53)$$

where

$$H_* = \sum_{j: |\mu_j - \tau| \geq \varepsilon} |\mu_j - \tau|^{-2}. \quad (54)$$

With this choice of  $\beta$ , the smallest  $\delta$  for which the inequality holds is

$$\delta = \exp \left\{ -\frac{\gamma^2}{2R^2} \left( \sqrt{\frac{T}{\gamma H_*}} - \|\boldsymbol{\mu}\|_{\mathbf{L}_\lambda} \right)^2 + d_T \log \left( 1 + \frac{T}{\gamma\lambda} \right) \right\}, \quad (55)$$

provided  $\|\boldsymbol{\mu}\|_{\mathbf{L}_\lambda} \leq \sqrt{\frac{T}{\gamma H_*}}$ .

## E PROOF OF LEMMAS

### E.1 Proof of Lemma A.1

To prove Lemma A.1, we first need the following lemma, which is a direct consequence of Theorem 1 of Abbasi-Yadkori et al. (2011):

**Lemma E.1.** *For any  $\delta > 0$ , with probability at least  $1 - \delta$ , for all  $t \geq 0$ ,*

$$\|\boldsymbol{\xi}_t\|_{\mathbf{V}_t^{-1}}^2 \leq R^2 \log \left( \frac{|\mathbf{V}_t|}{\delta^2 |\mathbf{L}_\lambda|} \right). \quad (56)$$

Using Lemma E.1, the proof of Lemma A.1 follows that of Lemma 3 of Valko et al. (2014). Let  $\mathbf{N}_t = \text{diag}(\mathbf{n}_t)$ , and note that  $\mathbf{x}_t = (\mathbf{N}_t \boldsymbol{\mu} + \boldsymbol{\xi}_t)/\gamma$ . Then

$$\begin{aligned} |\widehat{\mu}_i^t - \mu_i| &= |\langle \mathbf{e}_i, \mathbf{V}_t^{-1} (\mathbf{N}_t \boldsymbol{\mu} + \boldsymbol{\xi}_t)/\gamma - \boldsymbol{\mu} \rangle| \\ &= |\langle \mathbf{e}_i, \mathbf{V}_t^{-1} \boldsymbol{\xi}_t/\gamma - \mathbf{V}_t^{-1} (\mathbf{V}_t - \mathbf{N}_t/\gamma) \boldsymbol{\mu} \rangle| \\ &\leq \left| \langle \mathbf{e}_i, \boldsymbol{\xi}_t/\gamma \rangle_{\mathbf{V}_t^{-1}} \right| + \left| \langle \mathbf{e}_i, \mathbf{L}_\lambda \boldsymbol{\mu} \rangle_{\mathbf{V}_t^{-1}} \right| \\ &\leq \sigma_i^t \left( \|\boldsymbol{\xi}_t/\gamma\|_{\mathbf{V}_t^{-1}} + \|\mathbf{L}_\lambda \boldsymbol{\mu}\|_{\mathbf{V}_t^{-1}} \right), \end{aligned} \quad (57)$$

where the last inequality comes from Cauchy-Schwarz and the fact that  $\sigma_i^t = \|\mathbf{e}_i\|_{\mathbf{V}_t^{-1}}$ . The first term is bounded by Lemma E.1, and the second term is bounded as follows:

$$\begin{aligned} \|\mathbf{L}_\lambda \boldsymbol{\mu}\|_{\mathbf{V}_t^{-1}}^2 &= \boldsymbol{\mu}^\top \mathbf{L}_\lambda \mathbf{V}_t^{-1} \mathbf{L}_\lambda \boldsymbol{\mu} \\ &= \boldsymbol{\mu}^\top \left( \mathbf{L}_\lambda - \mathbf{N}_t^{1/2} \left( \gamma \mathbf{I} + \mathbf{N}_t^{1/2} \mathbf{L}_\lambda \mathbf{N}_t^{1/2} \right)^{-1} \mathbf{N}_t^{1/2} \right) \boldsymbol{\mu} \\ &\leq \boldsymbol{\mu}^\top \mathbf{L}_\lambda \boldsymbol{\mu} = \|\boldsymbol{\mu}\|_{\mathbf{L}_\lambda}^2, \end{aligned} \tag{58}$$

where the second equality comes from the Woodbury matrix identity, and the first inequality is from the subtrahend being positive semidefinite.

## E.2 Proof of Lemma A.2

From the Sherman–Morrison formula, for  $t \geq 1$ ,

$$\begin{aligned} (\sigma_i^t)^2 &= \mathbf{e}_i^\top \left( \mathbf{V}_{t-1} + \mathbf{e}_{\pi_t} \mathbf{e}_{\pi_t}^\top / \gamma \right)^{-1} \mathbf{e}_i \\ &= \mathbf{e}_i^\top \left( \mathbf{V}_{t-1}^{-1} - \frac{\mathbf{V}_{t-1}^{-1} \mathbf{e}_{\pi_t} \mathbf{e}_{\pi_t}^\top \mathbf{V}_{t-1}^{-1}}{\gamma + \mathbf{e}_{\pi_t}^\top \mathbf{V}_{t-1}^{-1} \mathbf{e}_{\pi_t}} \right) \mathbf{e}_i \\ &= (\sigma_i^{t-1})^2 - \frac{(\mathbf{e}_i^\top \mathbf{V}_{t-1}^{-1} \mathbf{e}_{\pi_t})^2}{\gamma + (\sigma_{\pi_t}^{t-1})^2}, \end{aligned} \tag{59}$$

so  $\sigma_i^t$  is decreasing in  $t$ . When  $\pi_t = i$ , the update depends only on the previous value  $\sigma_i^{t-1}$ . Consider the setting where  $\pi_t = i \forall t \geq 1$ . Then  $(\sigma_i^t)^2 = \gamma(\sigma_i^0)^2 / (\gamma + t(\sigma_i^0)^2)$ , which can be shown by induction. It clearly holds for  $t = 0$ . For  $t \geq 1$ ,

$$\begin{aligned} (\sigma_i^t)^2 &= (\sigma_i^{t-1})^2 \left( 1 - \frac{(\sigma_i^{t-1})^2}{\gamma + (\sigma_i^{t-1})^2} \right) \\ &= \frac{\gamma(\sigma_i^{t-1})^2}{\gamma + (\sigma_i^{t-1})^2} \\ &= \frac{\gamma^2(\sigma_i^0)^2}{(\gamma + (t-1)(\sigma_i^0)^2) \left( \gamma + \frac{\gamma(\sigma_i^0)^2}{\gamma + (t-1)(\sigma_i^0)^2} \right)} \\ &= \frac{\gamma(\sigma_i^0)^2}{\gamma + t(\sigma_i^0)^2}. \end{aligned} \tag{60}$$

In the setting where we do not have  $\pi_t = i$  for all  $t \geq 1$ , since  $\sigma_i^t$  is decreasing even when  $\pi_t \neq i$ , we can upper bound  $\sigma_i^t$  with what its value would be if at each time  $t$  such that  $\pi_t \neq i$  we do not update  $\sigma_i^t$ . This would mean that by time  $t$ ,  $\sigma_i^t$  has been updated  $n_i^t$  times, yielding the stated bound.

## E.3 Proof of Lemma A.3

This lemma is derived from Lemma 6 of Valko et al. (2014). If  $\mathbf{Q} \boldsymbol{\Lambda} \mathbf{Q}^\top$  is the eigendecomposition of  $\mathbf{L}_\lambda$ , then let  $\mathbf{V}_T$  and  $\boldsymbol{\Lambda}$  in the notation of Valko et al. (2014) be equal to  $\gamma \mathbf{Q}^\top \mathbf{V}_T \mathbf{Q}$  and  $\gamma \boldsymbol{\Lambda}$ , respectively, in our notation. The result follows by the invariance of determinants under unitary transformations.
